# Supplementary material for: A Novel Exploration of a Combination of Gambogic Acid with TiO2 Nanofibers: The Photodynamic Effect for HepG2 Cell Proliferation
Source: PubMed Central journal article supplement (PMC5456129; doi:10.3390/ma7096865), 2014-09-24

## Supplementary Materials

**Table S1.** The cytotoxicity of GA (gambogic acid) and relevant nanocomposites in which TiO<sub>2</sub> nanofibers was 5 µg/mL for HepG2 cells and the photodynamic effect of these nanocomposites after UV irradiation at different culture times.

| GA<br>(µg/mL) | Cell Inhibition/% |                     |                                  |            |                     |                                  |            |                     |                                  |
|---------------|-------------------|---------------------|----------------------------------|------------|---------------------|----------------------------------|------------|---------------------|----------------------------------|
|               | 24 h              |                     |                                  | 48 h       |                     |                                  | 72 h       |                     |                                  |
|               | GA                | GA-TiO <sub>2</sub> | GA-TiO <sub>2</sub><br>(with UV) | GA         | GA-TiO <sub>2</sub> | GA-TiO <sub>2</sub><br>(with UV) | GA         | GA-TiO <sub>2</sub> | GA-TiO <sub>2</sub><br>(with UV) |
| 0.0625        | 2.1 ± 2.4         | 4.5 ± 3.9           | 10.9 ± 3.7                       | 5.0 ± 2.1  | 11.9 ± 2.9          | 21.5 ± 3.5                       | 9.3 ± 2.4  | 15.9 ± 4.2          | 30.1 ± 3.7                       |
| 0.125         | 4.3 ± 3.1         | 8.5 ± 1.6           | 17.0 ± 4.3                       | 8.5 ± 3.2  | 25.2 ± 4.1          | 31.9 ± 4.4                       | 19.5 ± 3.2 | 35.9 ± 3.6          | 53.2 ± 4.1                       |
| 0.25          | 10.3 ± 3.2        | 15.1 ± 2.3          | 23.3 ± 4.4                       | 14.5 ± 4.1 | 41.5 ± 2.9          | 52.1 ± 3.8                       | 39.4 ± 3.9 | 47.6 ± 4.7          | 69.1 ± 3.5                       |
| 0.50          | 21.5 ± 2.6        | 33.2 ± 3.6          | 49.2 ± 3.1                       | 33.8 ± 3.2 | 54.9 ± 4.3          | 75.8 ± 3.2                       | 48.7 ± 2.5 | 63.0 ± 3.7          | 87.3 ± 4.1                       |
| 1.00          | 30.3 ± 3.7        | 46.9 ± 2.5          | 63.2 ± 3.5                       | 47.8 ± 3.2 | 68.8 ± 3.7          | 87.4 ± 4.2                       | 71.8 ± 4.1 | 84.5 ± 3.5          | 96.9 ± 4.2                       |
| 2.00          | 35.9 ± 3.1        | 55.1 ± 3.16         | 70.1 ± 4.6                       | 63.1 ± 2.6 | 86.7 ± 3.4          | 95.3 ± 3.9                       | 82.1 ± 3.1 | 93.9 ± 3.8          | 96.3 ± 2.5                       |

**Table S2.** Cytotoxicity of GA and GA-TiO<sub>2</sub> nanocomposites for HELF (human embryonic lung fibroblast) cells.

| GA<br>(µg/mL) | Cell Inhibition/% |                     |                                  |            |                     |                                  |            |                     |                                  |
|---------------|-------------------|---------------------|----------------------------------|------------|---------------------|----------------------------------|------------|---------------------|----------------------------------|
|               | 24 h              |                     |                                  | 48 h       |                     |                                  | 72 h       |                     |                                  |
|               | GA                | GA-TiO <sub>2</sub> | GA-TiO <sub>2</sub><br>(with UV) | GA         | GA-TiO <sub>2</sub> | GA-TiO <sub>2</sub><br>(with UV) | GA         | GA-TiO <sub>2</sub> | GA-TiO <sub>2</sub><br>(with UV) |
| 0.0625        | 0.8 ± 1.8         | 1.5 ± 3.8           | 5.8 ± 4.2                        | 1.7 ± 2.3  | 3.9 ± 2.8           | 7.1 ± 3.0                        | 3.8 ± 3.0  | 5.5 ± 2.2           | 10.0 ± 3.7                       |
| 0.125         | 2.5 ± 1.5         | 4.3 ± 2.3           | 11.1 ± 4.1                       | 3.3 ± 2.2  | 6.2 ± 3.1           | 15.2 ± 3.4                       | 6.0 ± 1.6  | 10.9 ± 2.6          | 18.1 ± 4.6                       |
| 0.25          | 5.6 ± 2.9         | 8.2 ± 3.3           | 16.0 ± 4.5                       | 7.2 ± 3.1  | 13.1 ± 3.9          | 22.6 ± 3.9                       | 10.1 ± 3.5 | 15.5 ± 4.3          | 29.8 ± 3.8                       |
| 0.50          | 16.1 ± 3.0        | 20.3 ± 2.8          | 30.4 ± 3.2                       | 20.9 ± 2.9 | 25.9 ± 4.1          | 35.9 ± 3.5                       | 29.5 ± 3.9 | 33.9 ± 3.7          | 41.6 ± 4.4                       |
| 1.00          | 30.8 ± 3.1        | 36.9 ± 3.6          | 43.2 ± 4.3                       | 35.7 ± 3.2 | 40.0 ± 3.7          | 50.3 ± 4.6                       | 41.2 ± 3.3 | 48.5 ± 3.6          | 56.8 ± 3.6                       |
| 2.00          | 43.3 ± 2.7        | 48.4 ± 4.6          | 60.1 ± 4.9                       | 57.6 ± 3.1 | 66.2 ± 3.0          | 75.3 ± 3.6                       | 66.3 ± 2.5 | 73.0 ± 3.8          | 86.9 ± 4.5                       |

**Figure S1.** The cytotoxicity of TiO<sub>2</sub> nanofibers at 48 h and the photodynamic effect after UV irradiation.

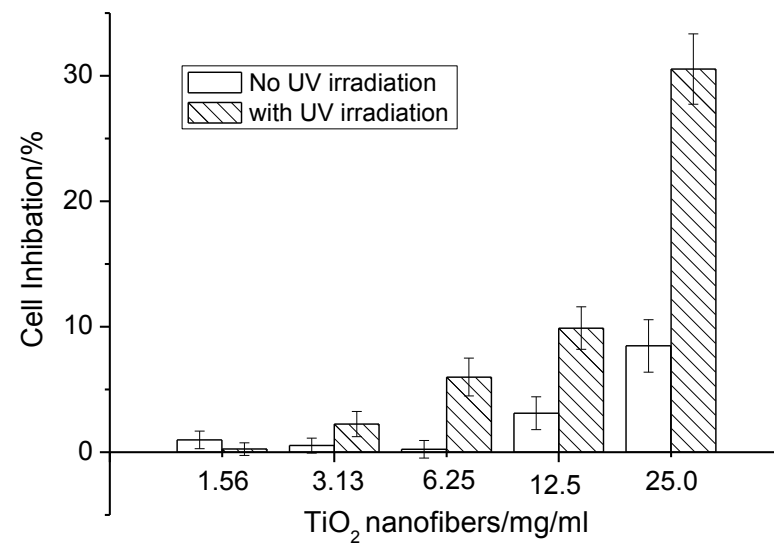

Supplement: materials-07-06865-s001.pdf [file materials-07-06865-s001.pdf]
